# Supplementary material
Source: publisher figshare collection journal article supplement (https://aacr.figshare.com/articles/dataset/_/23782450)

**Supplementary Figure S10- Representative IHC images from WHIM16 and CTG-3346 tumors.** Ovx mice bearing tumors ~200 mm<sup>3</sup> were randomized to treatment ± E2 by s.c. pellet. Tumors were harvested 24 h later and FFPE. Sections were analyzed by IHC. Quantitative results are shown in Fig. 3C.

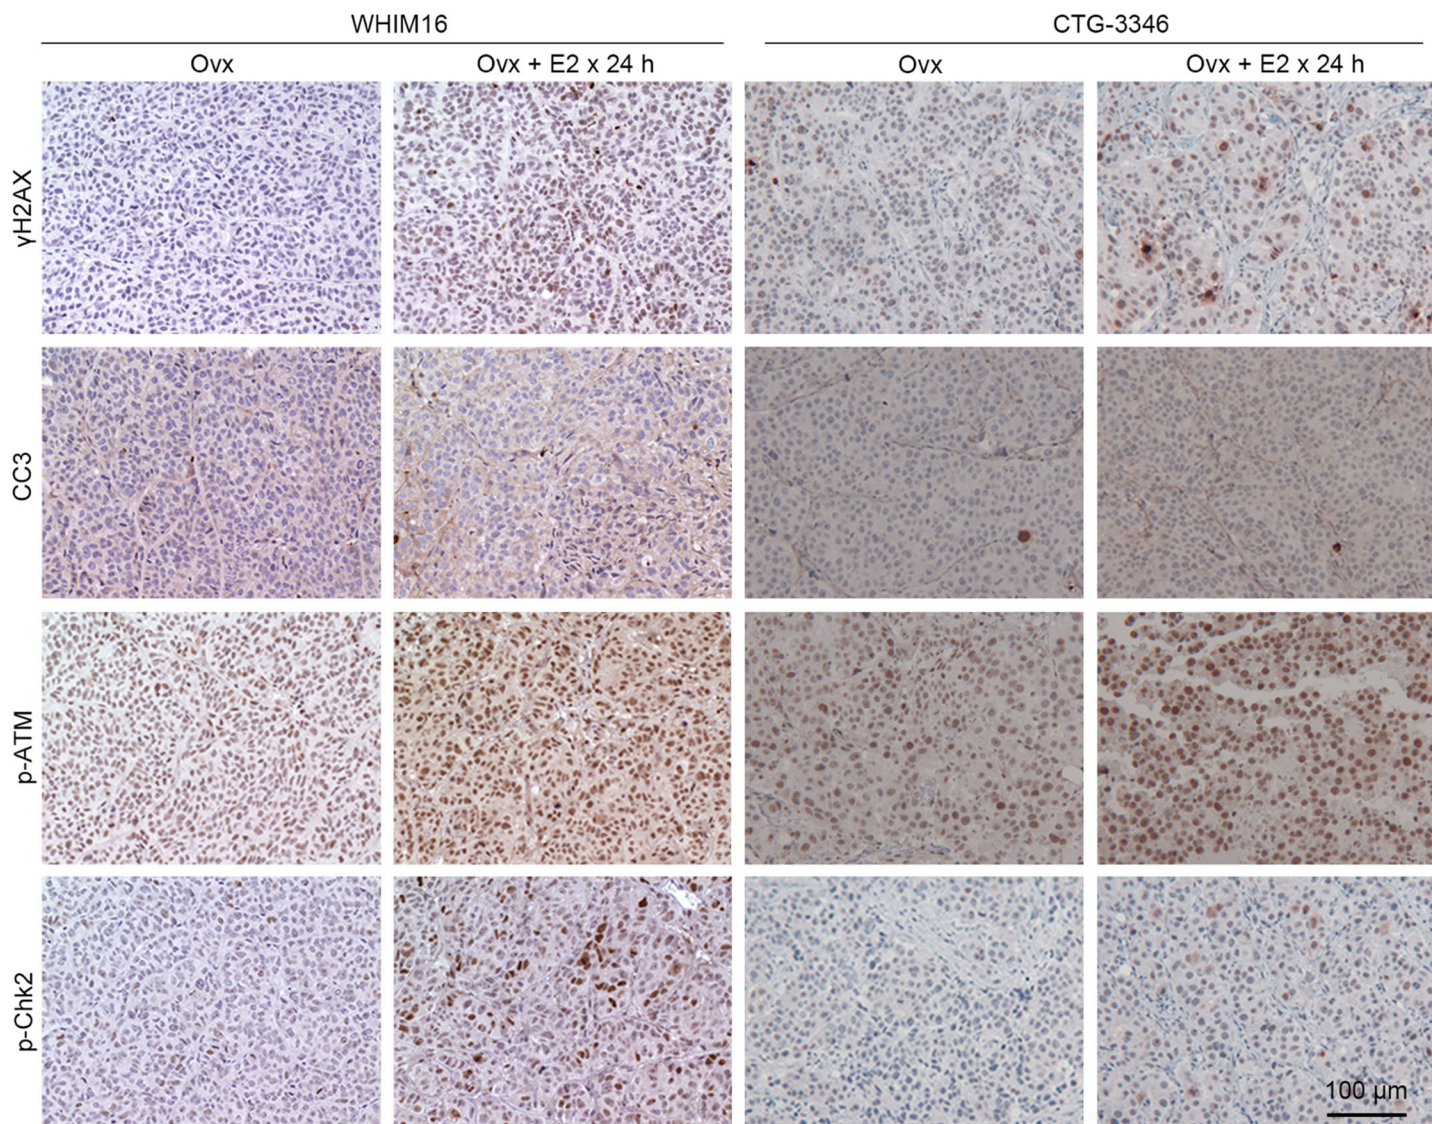

Supplement: Supplementary file 1 [file 41716021]
